# Supplementary material for: Dehydration induced 2D-to-3D crystal-to-crystal network re-assembly and ferromagnetism tuning within two chiral copper(ii)–tartrate coordination polymers
Source: Royal Society of Chemistry journal article supplement (doi:10.1039/c3dt52330f), 2013-01-01
Supplement: c3dt52330f.pdf [file c3dt52330f.pdf]

## Electronic Supplementary Information

### Dehydration Induced 2D-to-3D crystal-to-crystal Network Re-assembly and Ferromagnetism Tuning within two Chiral Copper(II)-Tartrate Coordination Polymers

Yen-Hsiang Liu<sup>[a]\*</sup>, Szu-Hsuan Lee<sup>[a]</sup>, Jung-Chun Chiang<sup>[a]</sup>,  
Po-Chen Chen<sup>[a]</sup>, Po-Hsiu Chien<sup>[a]</sup> and Chen-I Yang<sup>[b]\*</sup>

[a] Department of Chemistry, Fu Jen Catholic University,  
New Taipei City 24205, Taiwan

[b] Department of Chemistry, Tunghai University, Taichung, Taiwan

**Keywords:** coordination polymers / Chiral / ferromagnetism / superexchange

#### Table of Contents

**Fig. S1.** A view of the atom-to-atom distance between the O(carboxylate) atoms and the copper centers of the adjacent layers of compound **1**: Cu(1)⋯O(2): 4.25 Å; Cu(2)⋯O(4): 4.56 Å.

**Fig. S2.** Plots of  $\chi_M^{-1}$  vs.  $T$  for compound **1**. The solid line is estimated from the Curie–Weiss law.

**Fig. S3.** Plots of  $\chi_M^{-1}$  vs.  $T$  for compound **2**. The solid line is estimated from the Curie–Weiss law.

**Fig. S4.** A graphical representation of the 2D layer formed by the *syn-anti* bridged Cu-carboxylate coordination chains that derived from the 3D network of compound **2**.

**Fig. S5.** The powder X-ray diffraction diagram of **1**: (a) simulation; (b) as-synthesized sample.

**Fig. S6.** The powder X-ray diffraction diagram of **2**: (a) simulation; (b) as-synthesized sample.

**Table S1.** Hydrogen bonds for **1** [Å and °].

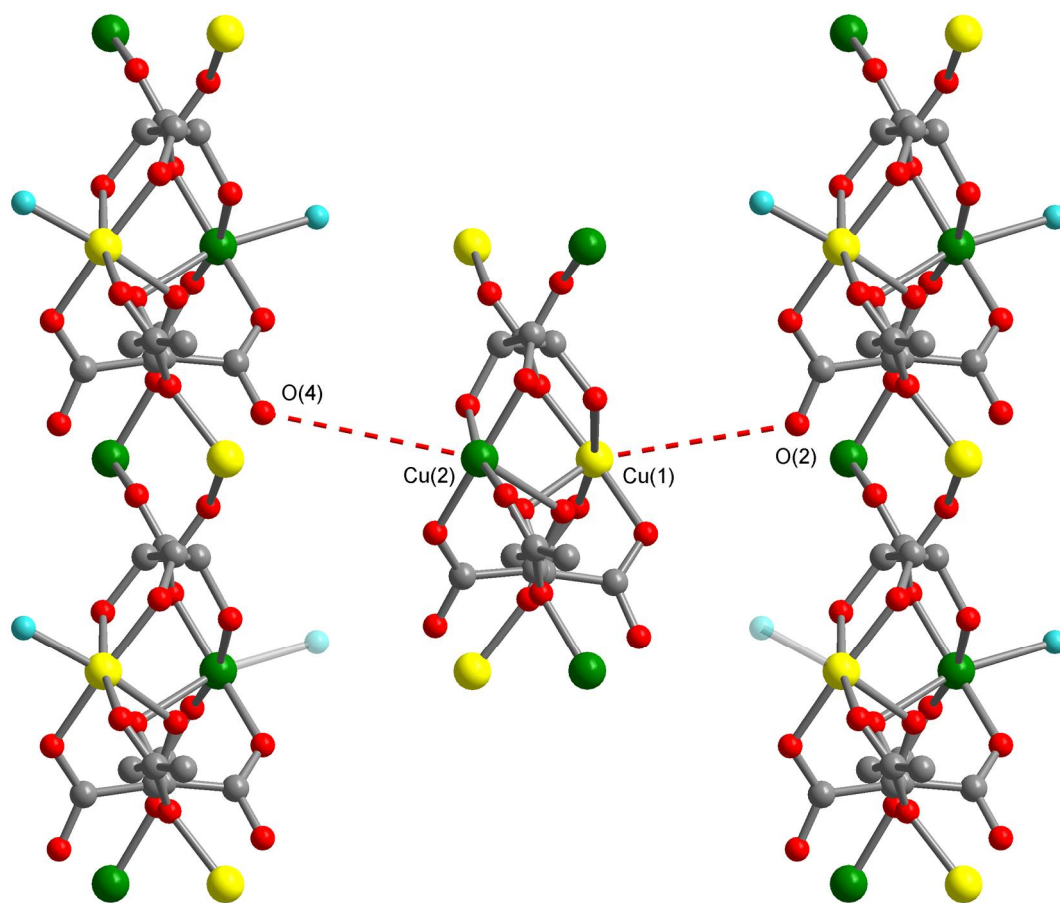

**Fig. S1.** A view of the atom-to-atom distance between the O(carboxylate) atoms and the copper centers of the adjacent layers of compound **1**: Cu(1)···O(2): 4.25 Å; Cu(2)···O(4): 4.56 Å.

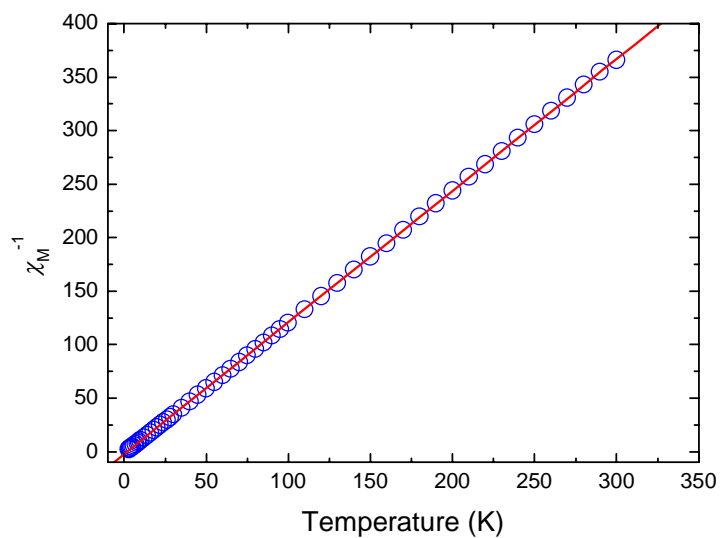

**Fig. S2.** Plots of  $\chi_M^{-1}$  vs.  $T$  for compound **1**. The solid line is estimated from the Curie–Weiss law.

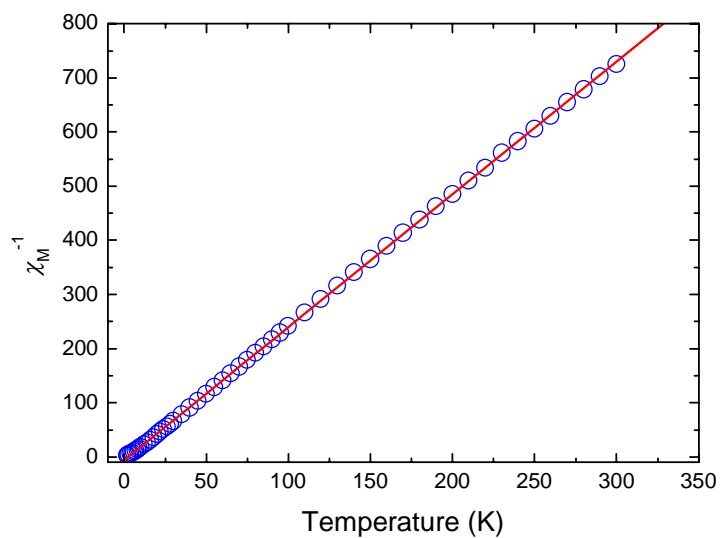

**Fig. S3.** Plots of  $\chi_M^{-1}$  vs.  $T$  for compound **2**. The solid line is estimated from the Curie–Weiss law.

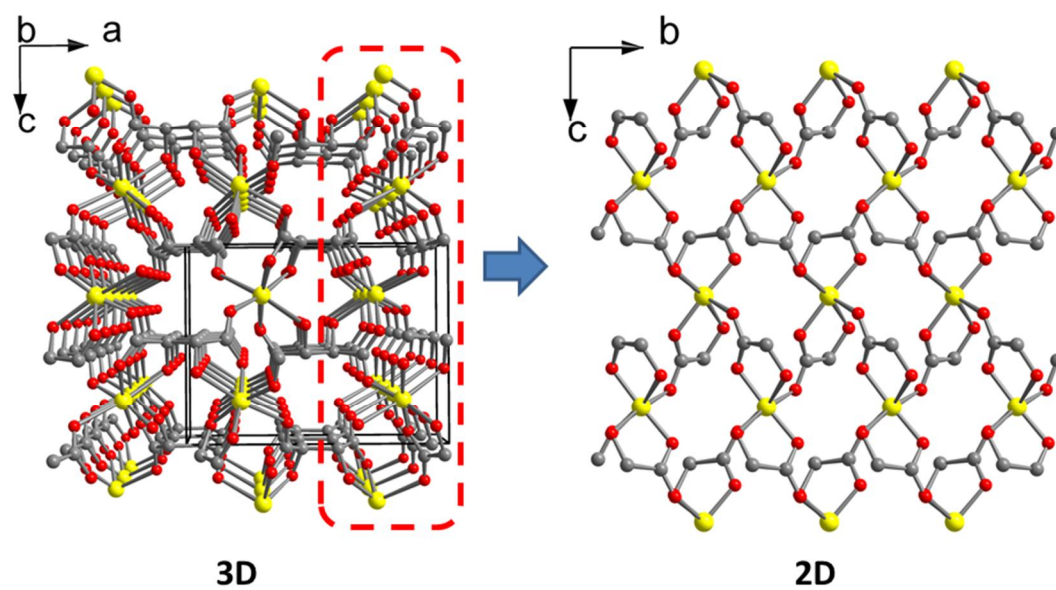

**Fig. S4.** A graphical representation of the 2D layer formed by the *syn-anti* bridged Cu-carboxylate coordination chains that derived from the 3D network of compound **2**.

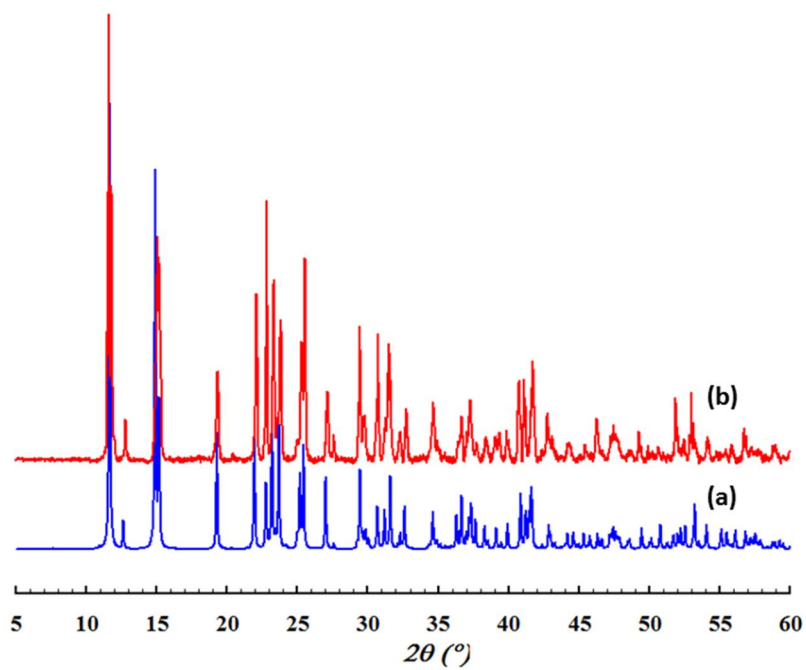

**Fig. S5.** The powder X-ray diffraction diagram of **1**: (a) simulation; (b) as-synthesized sample.

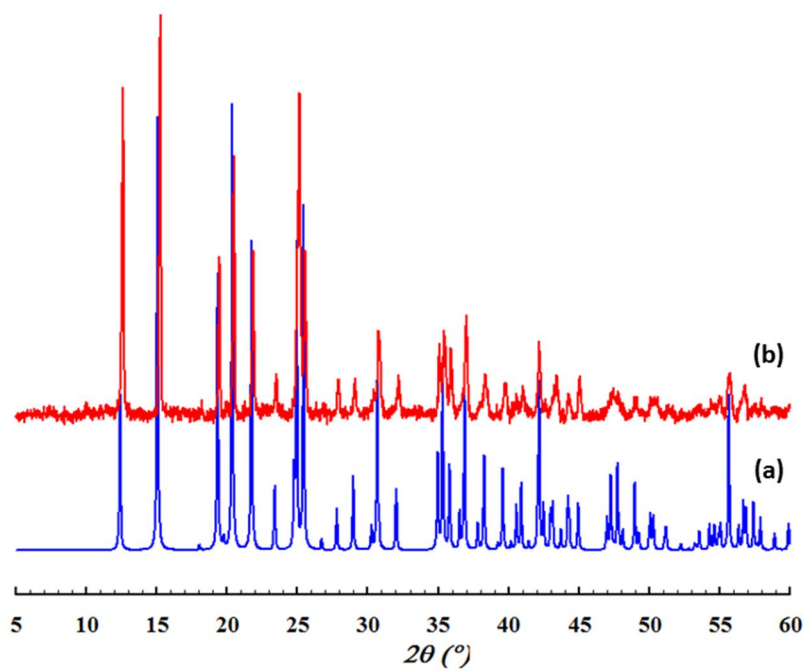

**Fig. S6.** The powder X-ray diffraction diagram of **2**: (a) simulation; (b) as-synthesized sample.

**Table S1.** Hydrogen bonds for **1** [Å and °].

| D–H···A                | d(D–H) | d(H···A) | d(D···A) | ∠(DHA) |
|------------------------|--------|----------|----------|--------|
| O(5)–H(5A)···O(91)     | 0.85   | 1.84     | 2.692(3) | 174.8  |
| O(11)–H(11A)···O(92)#5 | 0.83   | 1.81     | 2.636(3) | 171.1  |
| O(12)–H(12A)···O(94)   | 0.88   | 1.69     | 2.566(3) | 172.6  |
| O(81)–H(81A)···O(2)#6  | 0.82   | 1.99     | 2.750(3) | 154.8  |
| O(81)–H(81B)···O(91)#3 | 0.85   | 1.86     | 2.696(3) | 170.2  |
| O(82)–H(82A)···O(4)#7  | 0.82   | 1.93     | 2.688(3) | 153.0  |
| O(82)–H(82B)···O(92)#8 | 0.82   | 2.60     | 3.377(4) | 156.6  |
| O(91)–H(91A)···O(93)   | 0.95   | 1.82     | 2.767(3) | 171.1  |
| O(91)–H(91B)···O(2)#3  | 0.93   | 2.02     | 2.886(3) | 154.9  |
| O(92)–H(92A)···O(1)#3  | 0.85   | 2.15     | 2.767(3) | 129.7  |
| O(92)–H(92A)···O(81)#3 | 0.85   | 2.65     | 3.281(4) | 132.1  |
| O(92)–H(92B)···O(94)   | 0.85   | 1.91     | 2.731(3) | 162.3  |
| O(93)–H(93A)···O(82)#8 | 0.78   | 2.04     | 2.804(3) | 167.3  |
| O(93)–H(93B)···O(6)#9  | 0.87   | 1.87     | 2.713(3) | 163.1  |
| O(94)–H(94A)···O(93)   | 0.86   | 1.99     | 2.726(3) | 142.1  |
| O(94)–H(94B)···O(3)#7  | 0.86   | 1.91     | 2.750(3) | 163.5  |
| O(94)–H(94B)···O(4)#7  | 0.86   | 2.55     | 3.180(3) | 130.6  |
| O(6)–H(6B)···O(11)     | 0.89   | 1.92     | 2.741(3) | 154.2  |
| O(6)–H(6B)···O(5)      | 0.89   | 2.23     | 2.703(3) | 112.8  |

Symmetry transformations used to generate equivalent atoms:

#1 -x, y-1/2, -z+1 #2 -x+1, y-1/2, -z+2 #3 -x, y+1/2, -z+1

#4 -x+1, y+1/2, -z+2 #5 x+1, y, z #6 -x+1, y+1/2, -z+1

#7 -x, y+1/2, -z+2 #8 -x, y-1/2, -z+2 #9 x-1, y, z
